# Supplementary material for: A knockout mutation associated with juvenile paroxysmal dyskinesia in Markiesje dogs indicates SOD1 pleiotropy
Source: PubMed Central journal article supplement (PMC8519843; doi:10.1007/s00439-021-02271-6), 2021-03-07
Supplement: 439_2021_2271_MOESM2_ESM.pdf [file 439_2021_2271_MOESM2_ESM.pdf]

Supplementary Table S1. Oligonucleotides for genotyping of selected Illumina CanineHD SNPs.

| CanineHD SNP    | CFA31 position <sup>a</sup> | forward primer         | reverse primer         |
|-----------------|-----------------------------|------------------------|------------------------|
| BICF2P1156187   | 25160444                    | GCTTAACAGTCATAAGTCAGG  | TTCTTCTAGTAGCAGCCGAG   |
| BICF2P1103073   | 25644272                    | AGGATAAATGTAGCCGATAGGA | TGTAGTTGGAACCTTTAGTGTC |
| BICF2P755616    | 26434609                    | CTTCAGTTTACCTCCATAGCC  | CCACCTATGTTATTTAGCACCA |
| BICF2G630738979 | 26586191                    | ACTGTGGTATAGAGAAAGGGA  | GACACTGAACTTGATACTTCCT |

<sup>a</sup> position on CanFam3.1
